# Supplementary material for: Boosting the hydrogen evolution activity of a Co–N–C electrocatalyst by codoping with Al
Source: Royal Society of Chemistry journal article supplement (doi:10.1039/c9ra07939d), 2019-01-01
Supplement: c9ra07939d1.pdf [file c9ra07939d1.pdf]

Electronic Supplementary Material (ESI) for RSC Advances.  
This journal is © The Royal Society of Chemistry 2018

## Electronic Supplementary Information

**Boosting the hydrogen evolution activity of Co-N-C electrocatalyst by codoping with Al**

Xiao Zhou, Haoran Yu, Yang Liu, Yong Kong, Yongxin Tao, and Yong Qin\*

Jiangsu Key Laboratory of Advanced Catalytic Materials and Technology, School of Petrochemical Engineering, Changzhou University, Changzhou, Jiangsu, China

\*Corresponding authors:

E-mail: qinyong@cczu.edu.cn

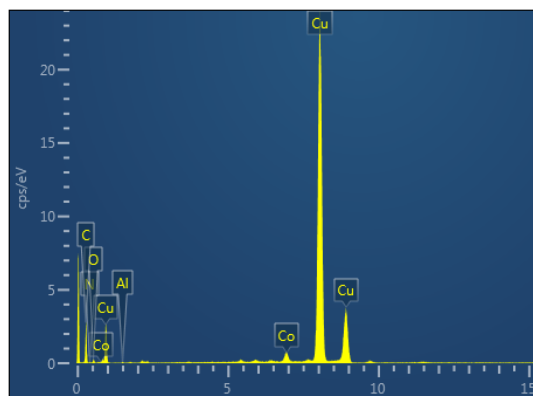

**Fig. S1** EDX of CANG by TEM.

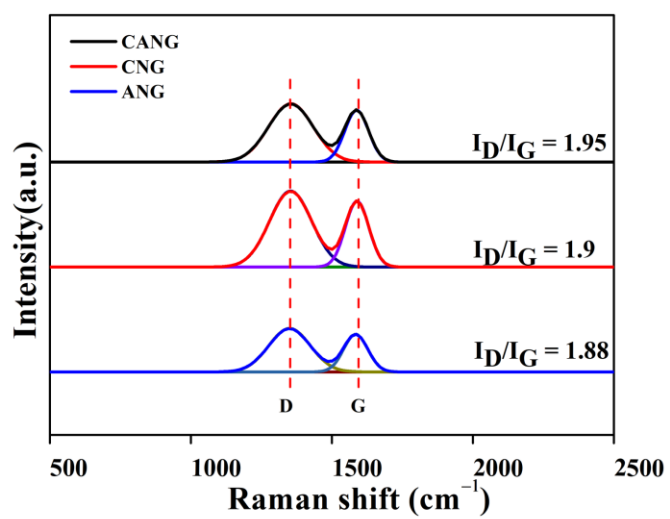

**Fig. S2** The fitted Raman spectra.

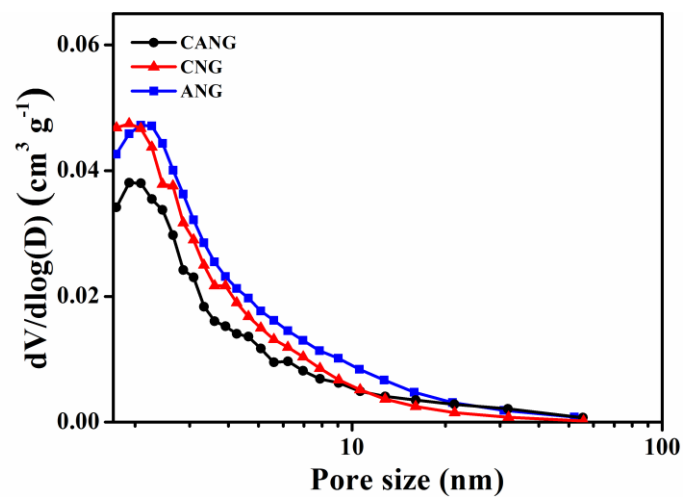

Fig. S3 The pore-size distribution curves of CANG, CNG, and ANG

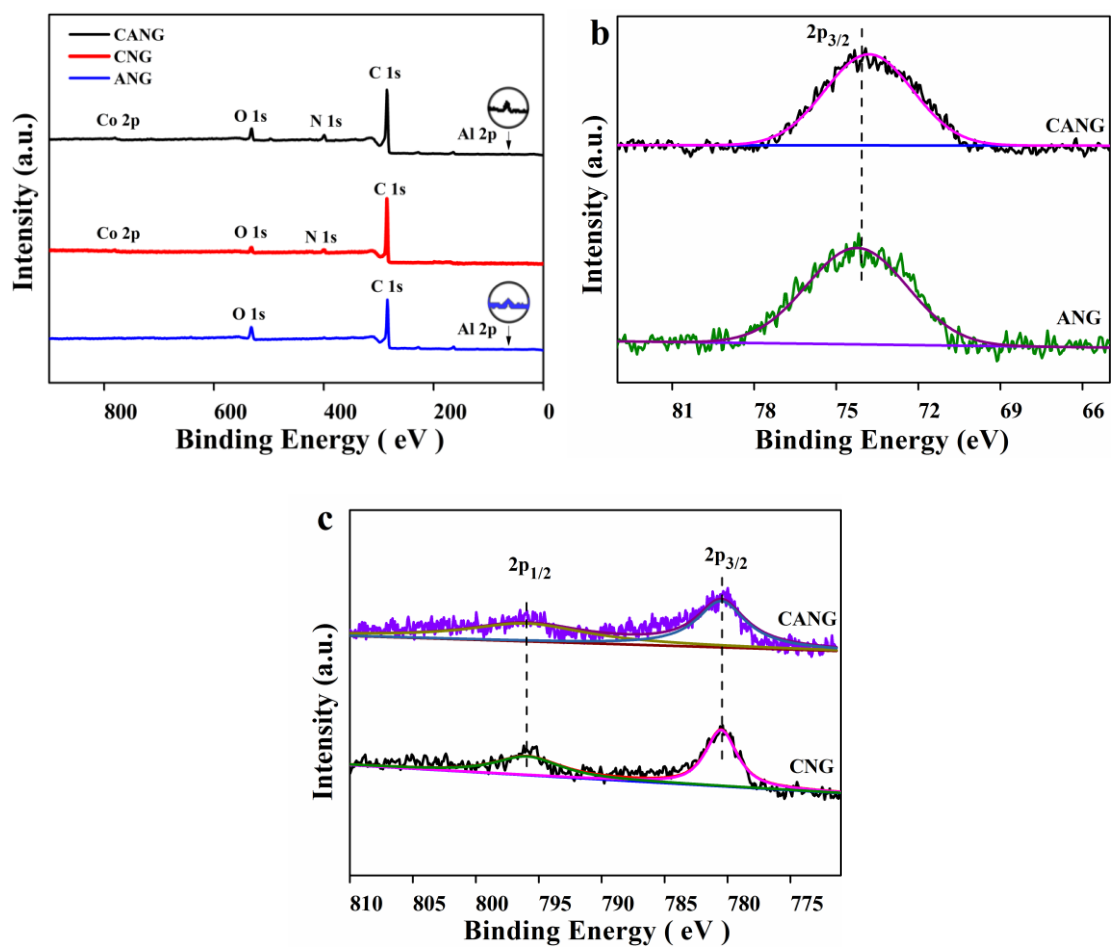

Fig. S4 The XPS survey (a), Al2p XPS (b), and Co2p (c) XPS of CANG.

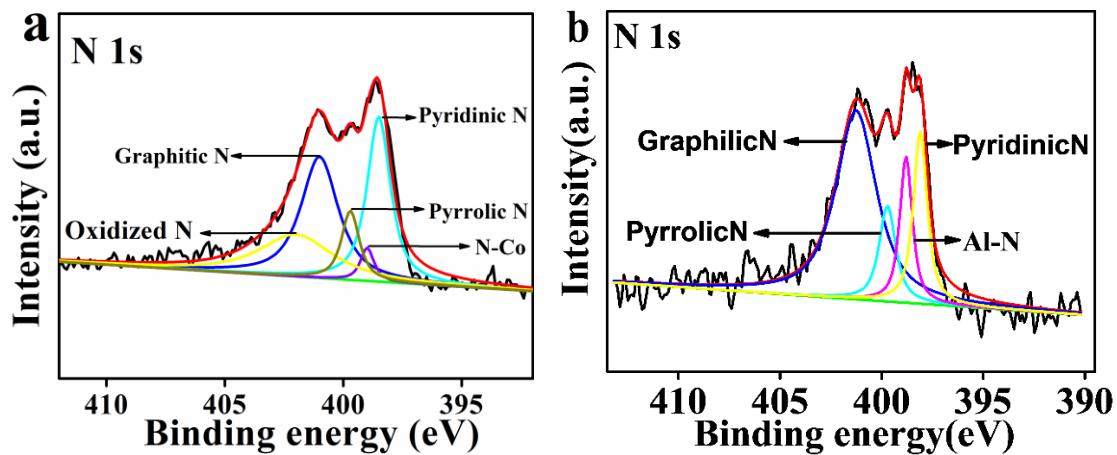

Fig. S5 The N1s XPS of CNG (a) and ANG (b).

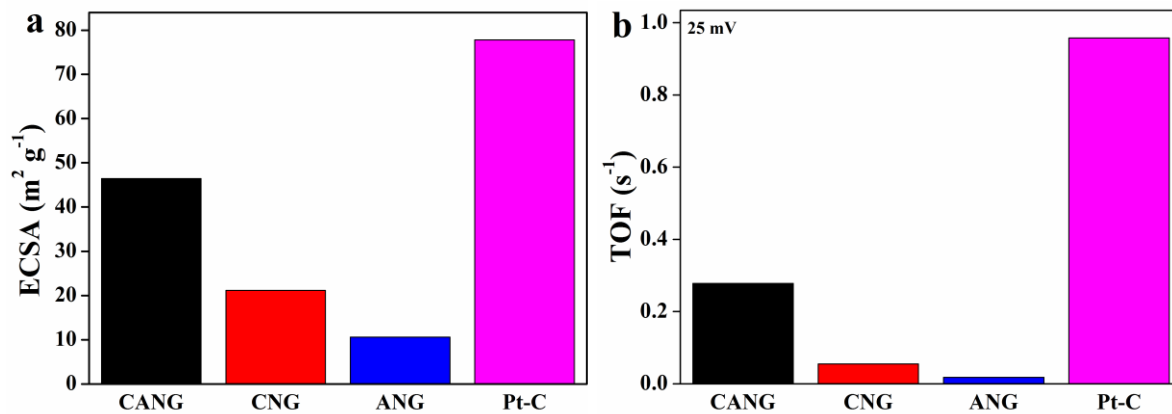

Fig. S6 The ECSA and TOF (@25mV) of CANG, CNG, ANG and Pt/C in 0.5 M  $\text{H}_2\text{SO}_4$ .

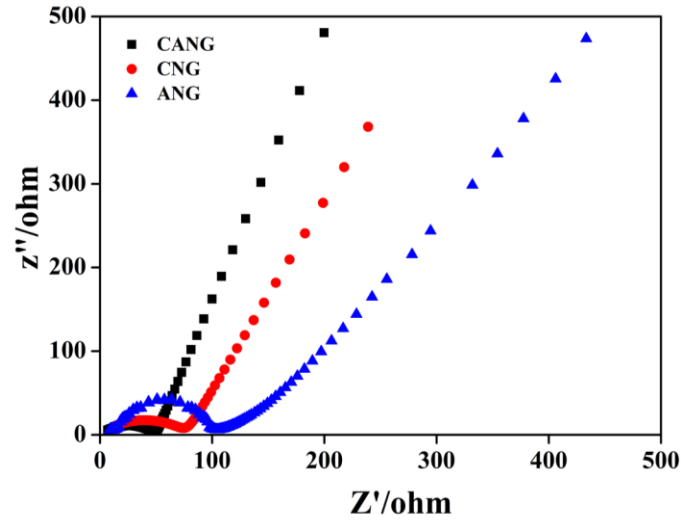

Fig. S7 The EIS of CANG, CNG, and ANG in 0.5 M  $\text{H}_2\text{SO}_4$ .

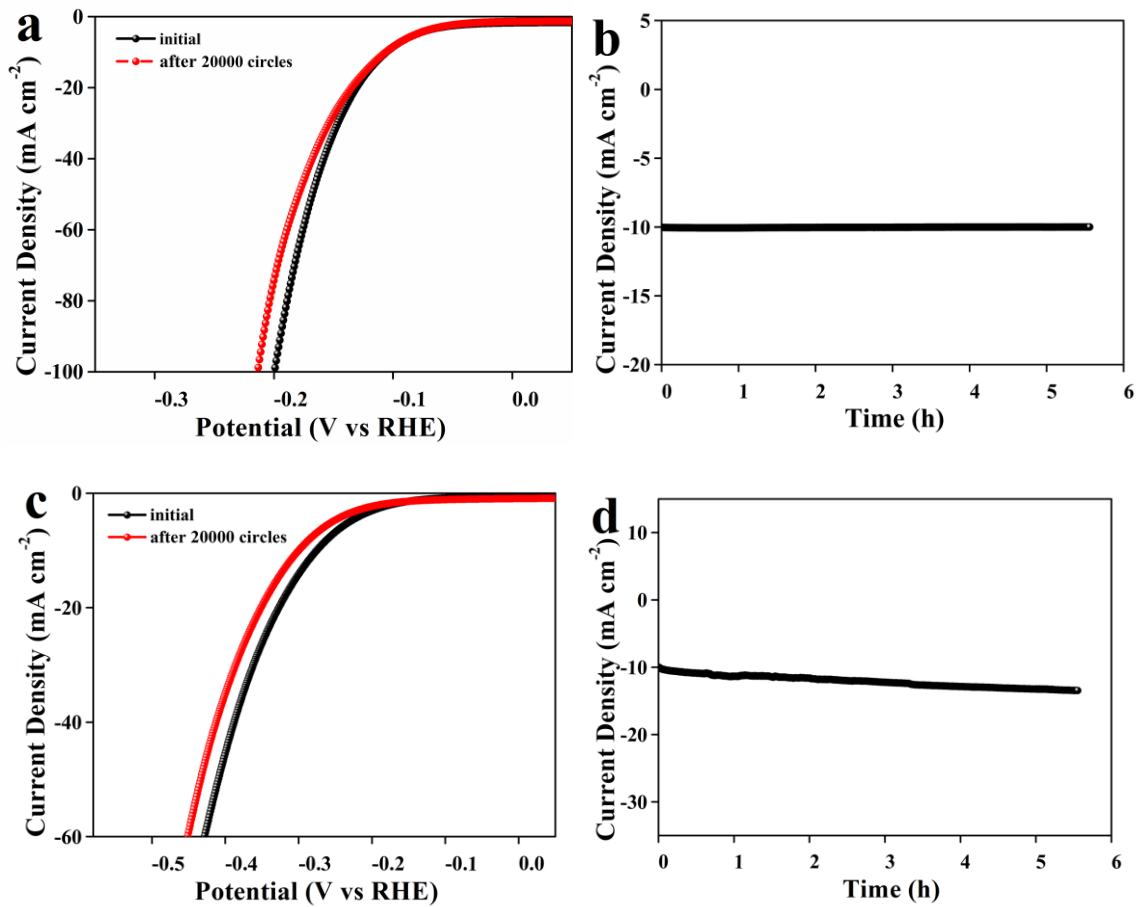

Fig. S8 The cyclic stability of CANG in 0.5 M  $\text{H}_2\text{SO}_4$  (a, b) and 1 M KOH (c, d). (a, c) LSV curves, (b, d) i-t curves.

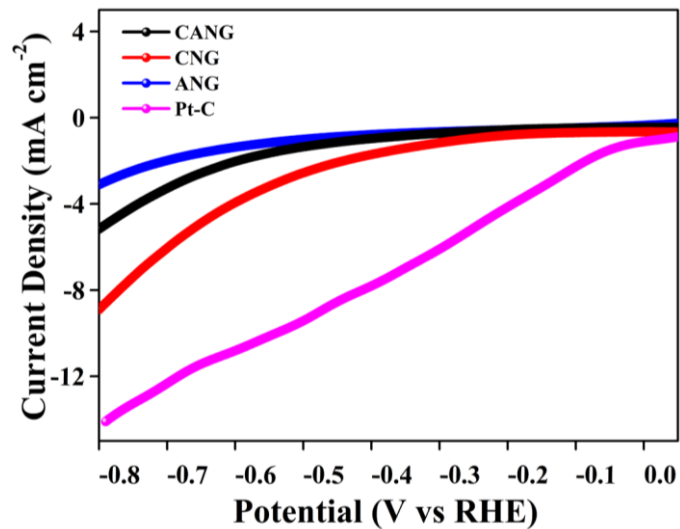

**Fig. S9** The HER activity of CANG, CNG, ANG, and Pt/C in a neutral media (1 M PBS).

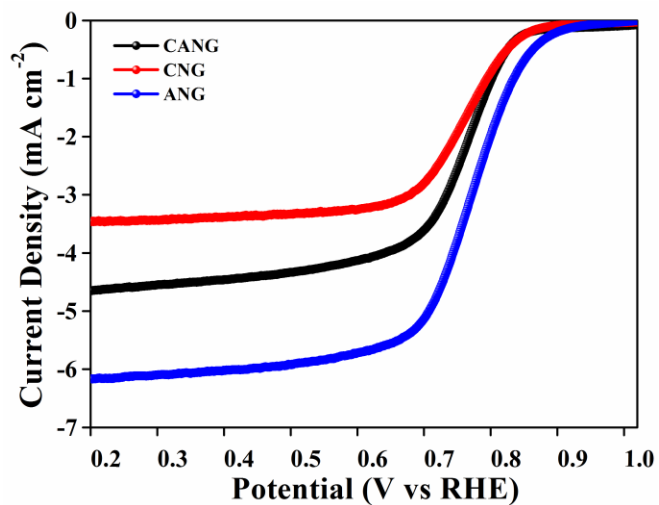

**Fig. S10** The ORR activity of CANG, CNG, and ANG in 0.1 M KOH.

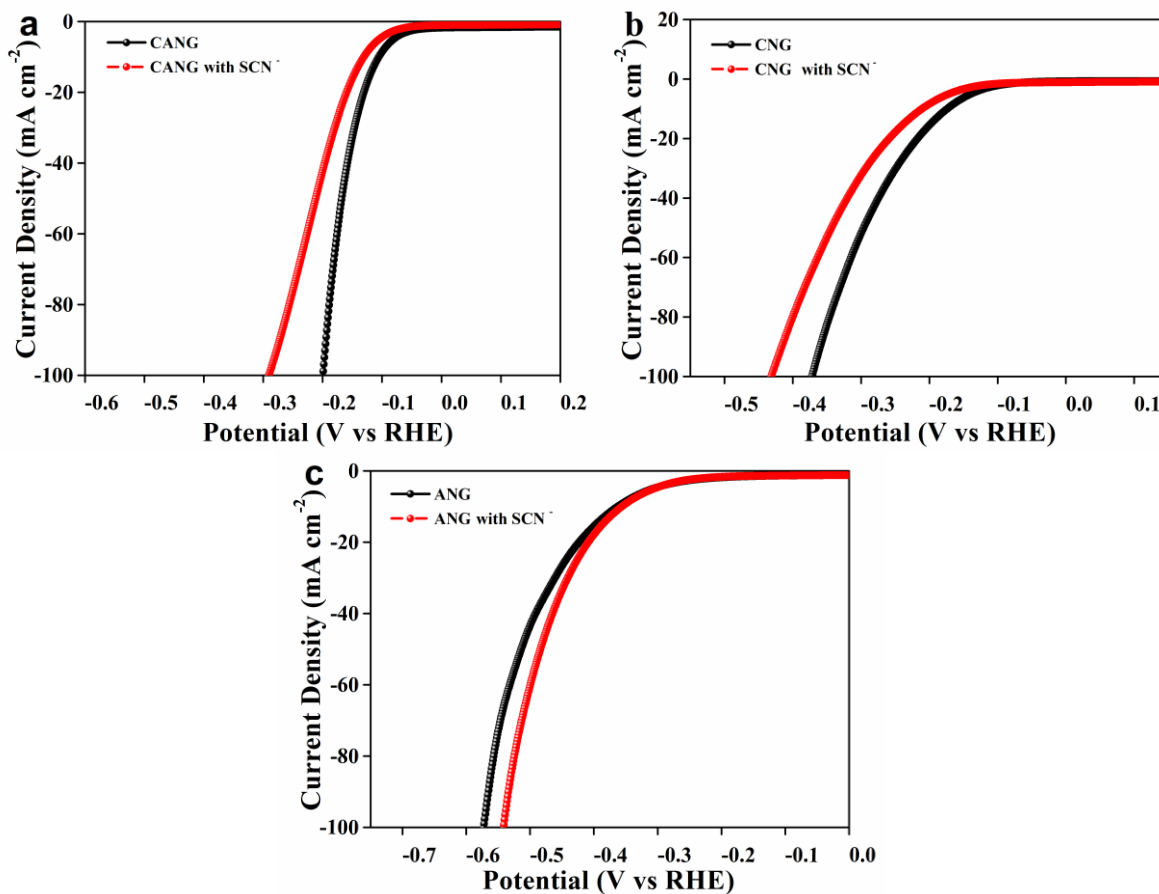

**Fig. S11** The SCN<sup>-</sup> tests of CANG (a), CNG (b), and ANG (c) in 0.5 M H<sub>2</sub>SO<sub>4</sub>.

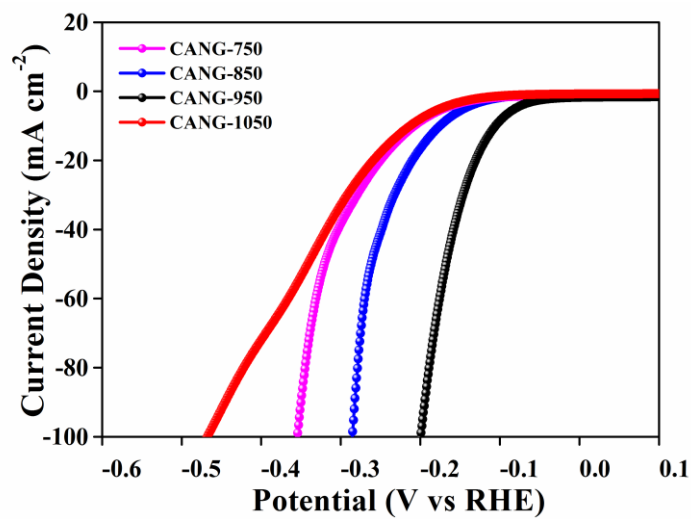

**Fig. S12** The HER activity of CANG fabricating at various temperatures ranged from 750 °C to 1050 °C in 0.5 M H<sub>2</sub>SO<sub>4</sub>.

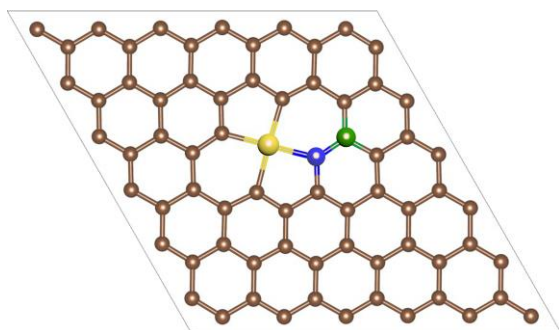

(CANG)

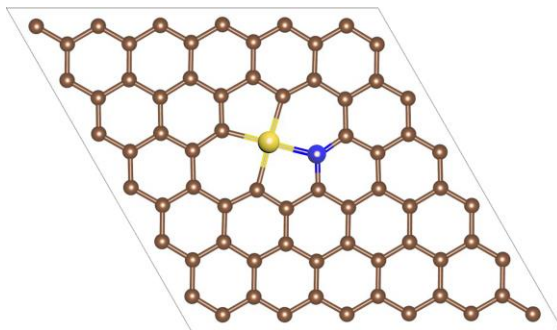

(CNG)

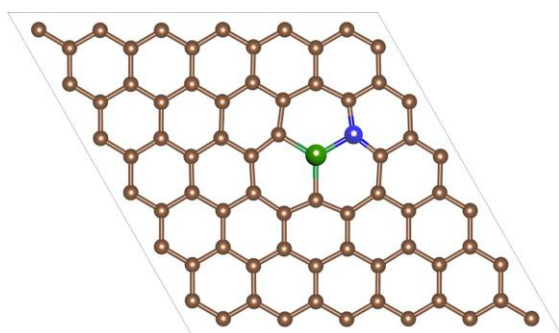

(ANG)

**Fig. S13** The structural model of active centre of CANG, CNG, and ANG.



**Tab. S1** The comparison of HER activity of our CANG with those reported Co-based catalyst in literature.

| Catalyst                                 | Medium                               | $\eta_{10}$<br>(mV) | Tafel slope<br>(mV dec <sup>-1</sup> ) | Reference |
|------------------------------------------|--------------------------------------|---------------------|----------------------------------------|-----------|
| CANG                                     | 0.5 M H <sub>2</sub> SO <sub>4</sub> | 106                 | 81.5                                   | This work |
|                                          | 1 M KOH                              | 275                 | 120                                    |           |
| PANiCo750A                               | 0.5 M H <sub>2</sub> SO <sub>4</sub> | 138                 | 55                                     | [1]       |
| CoN <sub>x</sub> /C                      | 0.5 M H <sub>2</sub> SO <sub>4</sub> | 133                 | 57                                     | [2]       |
| Co-NG                                    | 0.5 M H <sub>2</sub> SO <sub>4</sub> | 147                 | 82                                     | [3]       |
| Co <sub>3</sub> C/Co-N-C/G               | 0.5 M H <sub>2</sub> SO <sub>4</sub> | 103                 | 99                                     | [4]       |
| NC-Co <sub>0.85</sub> Se                 | 0.5 M H <sub>2</sub> SO <sub>4</sub> | 127                 | 34.1                                   | [5]       |
| CoP/C                                    | 0.5 M H <sub>2</sub> SO <sub>4</sub> | 151                 | 128                                    | [6]       |
| CeO <sub>2</sub> /Co (OH) <sub>2</sub>   | 1 M KOH                              | 317                 | 140                                    | [7]       |
| Co <sub>9</sub> S <sub>8</sub>           | 1 M KOH                              | 293                 | 127                                    | [8]       |
| Co <sub>9</sub> S <sub>8</sub> HMs-140/C | 1 M KOH                              | 250                 | 108                                    | [9]       |

**Tab. S2** The elemental component of CANG fabricated at various temperatures.

|    | 750 °C | 850 °C | 950 °C | 1050 °C |
|----|--------|--------|--------|---------|
| Co | 1.57%  | 1.84%  | 2.18%  | 1.84%   |
| Al | 0.21%  | 0.50%  | 0.51%  | 0.82%   |
| N  | 7.55%  | 5.51%  | 4.50%  | 3.33%   |

## Reference

- [1] Z. L. Wang, X. F. Hao, Z. Jiang, X. P. Sun, D. Xu, J. Wang, H. X. Zhong, F. L. Meng and X. B. Zhang, *J. Am. Chem. Soc.*, 2015, **137**, 15070.
- [2] H. W. Liang, S. Brüller, R. H. Dong, J. Zhang, X. L. Feng and K. Müllen, *Nat. commun.*, 2015, **6**, 7992.
- [3] H. L. Fei, J. C. Dong, M. Arellano, G. L. Ye, N. D. Kim, E. Samuel, Z. W. Peng, Z. Zhu, F. Qin, J. M. Bao, M. J. Yacaman, P. M. Ajayan, D. L. Chen and J. M. Tour, *Nat. Commun.*, 2015, **6**, 8668.
- [4] X. X. Ma, X. Q. He and T. Asefa, *Electrochim. Acta*, 2017, **257**, 40.
- [5] B. Yu, F. Qi, X. Q. Wang, B. J. Zheng, W. Q. Hou, Y. Hu, J. Lin, W. L. Zhang, Y.R. Li and Y. F. Chen, *Electrochim. Acta*, 2017, **247**, 468.
- [6] W. W. Wang, J. W. Li, M. F. Bi, Y. Y. Zhao, M. N. Chen and Z. Fang, *Electrochim. Acta*, 2018, **259**, 822.
- [7] M. C. Sung, G. H. Lee and D. W. Kim, *J. Alloys Compd.*, 2019, **800**, 450.
- [8] M. Basu, *Asian Chem. Edit. Soc.*, 2018, **10**, 1002.
- [9] Y. T. Zhang, S. J. Chao, X. B. Wang, H. J. Han, Z. Y. Bai and L. Yang, *Electrochim. Acta*, 2017, **246**, 380.
